# Supplementary material
Source: Elsevier journal article supplement (https://comptes-rendus.academie-sciences.fr/biologies/article/10.1016/j.crvi.2016.09.005/file/attach/mmc1.pdf)
Supplement: mmc1 [file mmc1.pdf]

Appendix A. Names and GPS coordinates of sampled localities

| Geographic region         | Country                          | N° | Locality name                         | GPS                      | GPS                      | Number of cytochrome b gene sequences for each taxon |                                  |                           |                                  |                                    |                                    |                              |                                 |                        |           |            |
|---------------------------|----------------------------------|----|---------------------------------------|--------------------------|--------------------------|------------------------------------------------------|----------------------------------|---------------------------|----------------------------------|------------------------------------|------------------------------------|------------------------------|---------------------------------|------------------------|-----------|------------|
|                           |                                  |    |                                       | ("°S; South)<br>Latitude | ("°W; West)<br>Longitude | <i>Micropteropus<br/>pusillus</i>                    | <i>Epomophorus<br/>gambianus</i> | <i>Eidolon<br/>helvum</i> | <i>Rousettus<br/>aegyptiacus</i> | <i>Nanonycteris<br/>veldkampii</i> | <i>Hypsignathus<br/>monstrosus</i> | <i>Epomops<br/>franqueti</i> | <i>Epomops<br/>buettikoferi</i> | <i>Epomops<br/>sp.</i> |           |            |
| Senegal                   | Senegal                          | 1  | Kédougou                              | 12.55                    | -12.20                   |                                                      |                                  |                           | 6                                |                                    |                                    |                              |                                 |                        |           |            |
| Senegal                   | Senegal                          | 2  | Kaf koun                              | 13.96                    | -14.81                   |                                                      |                                  | 1                         | 6                                |                                    |                                    |                              |                                 |                        |           |            |
| Senegal                   | Senegal                          | 3  | Mbour                                 | 14.53                    | -17.02                   |                                                      |                                  | 6                         | 4                                |                                    |                                    |                              |                                 |                        |           |            |
| Upper Guinean rainforest  | Ghana                            | 4  | Accra                                 | 5.59                     | -0.18                    |                                                      | 11                               | 3                         |                                  |                                    |                                    |                              |                                 |                        |           |            |
| Upper Guinean rainforest  | Ivory Coast                      | 5  | Abidjan                               | 5.36                     | -3.90                    |                                                      |                                  |                           |                                  | 7                                  |                                    |                              |                                 | 1                      |           | 1          |
| Upper Guinean rainforest  | Ivory Coast                      | 6  | Azagny/Gboyo                          | 5.24                     | -4.80                    |                                                      |                                  | 1                         |                                  | 11                                 |                                    | 13                           | 7                               | 18                     |           | 12         |
| Upper Guinean rainforest  | Ivory Coast                      | 7  | Lamto                                 | 6.22                     | -5.03                    | 3                                                    |                                  |                           |                                  | 2                                  |                                    | 1                            |                                 | 38                     |           | 1          |
| Upper Guinean rainforest  | Ivory Coast                      | 8  | Parc National De Mont Peko            | 6.93                     | -7.22                    |                                                      |                                  |                           |                                  | 1                                  |                                    |                              |                                 |                        |           |            |
| Upper Guinean rainforest  | Liberia                          | 9  | Nimba/Gangra                          | 7.41                     | -8.59                    | 1                                                    |                                  |                           | 10                               | 4                                  |                                    |                              |                                 | 3                      |           |            |
| Cameroon                  | Cameroon                         | 10 | Campo-Ma'an                           | 2.40                     | 10.04                    |                                                      |                                  | 7                         |                                  |                                    |                                    |                              | 18                              |                        |           |            |
| Cameroon                  | Cameroon                         | 11 | Mbonde Pygmeé                         | 5.37                     | 11.28                    |                                                      |                                  |                           |                                  |                                    |                                    | 2                            |                                 |                        |           |            |
| Cameroon                  | Cameroon                         | 12 | Dja                                   | 3.32                     | 12.91                    |                                                      |                                  |                           | 9                                | 1                                  |                                    | 3                            | 19                              |                        |           |            |
| Cameroon                  | Equatorial Guinea                | 13 | Bioko                                 | 3.75                     | 8.78                     |                                                      |                                  | 2                         |                                  |                                    |                                    |                              |                                 |                        |           |            |
| Cameroon                  | Cameroon                         | 14 | Korup                                 | 5.01                     | 8.86                     |                                                      |                                  |                           |                                  |                                    |                                    |                              |                                 | 9                      |           |            |
| Cameroon                  | Cameroon                         | 15 | Kribi                                 | 2.94                     | 9.91                     |                                                      |                                  |                           |                                  |                                    |                                    |                              |                                 | 1                      |           |            |
| western Equatorial Africa | Gabon                            | 16 | Albert Schweitzer Hospital/Keri       | -0.70                    | 10.24                    | 10                                                   |                                  | 2                         | 1                                |                                    |                                    | 5                            | 3                               |                        |           |            |
| western Equatorial Africa | Gabon                            | 17 | Ngounié                               | -1.49                    | 10.98                    |                                                      |                                  |                           | 1                                |                                    |                                    |                              |                                 |                        |           |            |
| western Equatorial Africa | Gabon                            | 18 | Ndenga                                | -1.91                    | 11.83                    |                                                      |                                  |                           |                                  |                                    |                                    | 1                            | 1                               |                        |           |            |
| western Equatorial Africa | Gabon                            | 19 | Ipassa Makokou                        | 0.52                     | 12.8                     |                                                      |                                  |                           |                                  |                                    |                                    | 2                            | 4                               |                        |           |            |
| western Equatorial Africa | Gabon                            | 20 | Moyabi/Lepaka                         | -1.68                    | 13.30                    |                                                      |                                  |                           |                                  |                                    |                                    | 3                            |                                 |                        |           |            |
| western Equatorial Africa | Gabon                            | 21 | Ekata                                 | 0.67                     | 14.30                    |                                                      |                                  |                           | 1                                |                                    |                                    | 6                            | 29                              |                        |           |            |
| western Equatorial Africa | Republic of the Congo            | 22 | Mbomo                                 | 0.42                     | 14.68                    | 8                                                    |                                  |                           |                                  |                                    |                                    | 15                           | 12                              |                        |           |            |
| western Equatorial Africa | Equatorial Guinea                | 23 | Rio Muni                              | 1.03                     | 9.65                     |                                                      |                                  |                           | 4                                |                                    |                                    |                              |                                 |                        |           |            |
| western Equatorial Africa | Equatorial Guinea                | 24 | Annobon                               | -1.46                    | 5.64                     |                                                      |                                  |                           | 3                                |                                    |                                    |                              |                                 |                        |           |            |
| western Equatorial Africa | Sao Tome and Principe            | 25 | Sao Tome                              | 0.25                     | 6.64                     |                                                      |                                  |                           | 6                                |                                    |                                    |                              |                                 |                        |           |            |
| Central African Republic  | Central African Republic         | 26 | Dzanga-Sangha                         | 3.10                     | 16.33                    |                                                      |                                  |                           |                                  |                                    |                                    |                              |                                 | 1                      |           |            |
| Central African Republic  | Central African Republic         | 27 | Mbaéré-Bodingué                       | 3.90                     | 17.16                    |                                                      |                                  |                           |                                  |                                    |                                    |                              |                                 | 3                      |           |            |
| Central African Republic  | Central African Republic         | 28 | Bangui                                | 4.37                     | 18.57                    | 104                                                  |                                  | 23                        | 20                               | 1                                  |                                    | 15                           | 16                              |                        |           |            |
| Central African Republic  | Central African Republic         | 29 | Mongo                                 | 3.78                     | 18.58                    |                                                      |                                  |                           |                                  |                                    |                                    | 1                            | 9                               |                        |           |            |
| eastern Equatorial Africa | Democratic Republic of the Congo | 30 | Yatolema                              | 0.413                    | 24.54                    |                                                      |                                  |                           |                                  |                                    |                                    | 3                            | 4                               |                        |           |            |
| eastern Equatorial Africa | Democratic Republic of the Congo | 31 | Kisangani zoological garden/Ile Maele | 0.54                     | 25.19                    |                                                      |                                  |                           | 6                                |                                    |                                    |                              | 2                               |                        |           |            |
| eastern Equatorial Africa | Democratic Republic of the Congo | 32 | Yoko / Mbiye / Yaengo                 | 0.29                     | 25.29                    |                                                      |                                  |                           |                                  |                                    |                                    | 6                            | 7                               |                        |           |            |
| eastern Equatorial Africa | Democratic Republic of the Congo | 33 | Uma (UMA020)                          | 0.57                     | 25.88                    |                                                      |                                  |                           |                                  | 2                                  |                                    |                              | 1                               |                        |           |            |
| eastern Equatorial Africa | Democratic Republic of the Congo | 34 | Bongandjolo                           | 1.66                     | 25.18                    |                                                      |                                  |                           |                                  |                                    |                                    |                              | 1                               |                        |           |            |
| eastern Africa            | Uganda                           | 35 | Kampala                               | 0.31                     | 32.55                    |                                                      |                                  |                           | 3                                |                                    |                                    |                              |                                 |                        |           |            |
| eastern Africa            | Uganda                           | 36 | Jinja                                 | 0.42                     | 33.20                    |                                                      |                                  |                           | 2                                |                                    |                                    |                              |                                 |                        |           |            |
| southeastern Africa       | Tanzania                         | 37 | Dar es Salaam                         | -6.80                    | 39.28                    |                                                      |                                  |                           | 3                                |                                    |                                    |                              |                                 |                        |           |            |
| southeastern Africa       | Democratic Republic of the Congo | 38 | Mukulakulu / Luena                    | -9.55                    | 25.80                    | 46                                                   |                                  |                           |                                  |                                    |                                    |                              |                                 |                        |           |            |
| southeastern Africa       | Democratic Republic of the Congo | 39 | Kitombongo                            | -8.90                    | 26.39                    | 3                                                    |                                  |                           |                                  |                                    |                                    |                              |                                 |                        |           |            |
| southeastern Africa       | Democratic Republic of the Congo | 40 | Upemba                                | -8.93                    | 26.57                    |                                                      |                                  |                           |                                  | 3                                  |                                    |                              |                                 |                        |           |            |
| southeastern Africa       | Democratic Republic of the Congo | 41 | Muvule                                | -9.15                    | 27.18                    | 2                                                    |                                  |                           |                                  |                                    |                                    |                              |                                 |                        |           |            |
| southeastern Africa       | Democratic Republic of the Congo | 42 | Eidolon land                          | -10.47                   | 27.74                    |                                                      |                                  |                           |                                  | 12                                 |                                    |                              |                                 |                        |           |            |
| southeastern Africa       | Zambia                           | 43 | Kasanka                               | -12.58                   | 30.20                    |                                                      |                                  |                           |                                  | 3                                  |                                    |                              |                                 |                        |           |            |
| southeastern Africa       | Malawi                           | 44 | Blantyre                              | -15.79                   | 35.01                    |                                                      |                                  |                           |                                  | 4                                  |                                    |                              |                                 |                        |           |            |
| southeastern Africa       | Malawi                           | 45 | Mulanje                               | -15.93                   | 35.52                    |                                                      |                                  |                           |                                  |                                    | 1                                  |                              |                                 |                        |           |            |
| southeastern Africa       | Mozambique                       | 46 | Mont Namuli                           | -15.37                   | 37.03                    |                                                      |                                  |                           |                                  |                                    | 1                                  |                              |                                 |                        |           |            |
| Mediterranean region      | Cyprus                           | 47 | Steni                                 | 35.00                    | 32.47                    |                                                      |                                  |                           |                                  |                                    | 3                                  |                              |                                 |                        |           |            |
| Mediterranean region      | Egypt                            | 48 | Wadi Feiran                           | 28.71                    | 33.32                    |                                                      |                                  |                           |                                  |                                    | 2                                  |                              |                                 |                        |           |            |
|                           |                                  |    |                                       |                          |                          | <b>TOTAL</b>                                         | <b>177</b>                       | <b>35</b>                 | <b>88</b>                        | <b>51</b>                          | <b>27</b>                          | <b>76</b>                    | <b>148</b>                      | <b>59</b>              | <b>14</b> | <b>675</b> |
|                           |                                  |    |                                       |                          |                          | This study                                           | 79                               | 12                        | 50                               | 47                                 | 26                                 | 76                           | 146                             | 59                     | 14        | 509        |
|                           |                                  |    |                                       |                          |                          | Published                                            | 98 <sup>a,b</sup>                | 23 <sup>a</sup>           | 38 <sup>b,c</sup>                | 2 <sup>a,b,d,e</sup>               | 1 <sup>f</sup>                     | 0                            | 2 <sup>a,b</sup>                | 0                      | 0         | 166        |

References

- a: Nesi, N., Nakouné, E., Cruaud, C. & Hassanin, A. (2011) DNA barcoding of African fruit bats (Mammalia, Pteropodidae). The mitochondrial genome does not provide a reliable discrimination between *Epomophorus gambianus* and *Micropteropus pusillus*. *Comptes Rendus Biologies*, 334, 544-554.
- b: Nesi, N., Kadojo, B., Pourrut, X., Leroy, E., Pongombo Shongo, C., Cruaud, C. & Hassanin, A. (2013). Molecular systematics and phylogeography of the tribe Myonycterini (Mammalia, Pteropodidae) inferred from mitochondrial and nuclear markers. *Molecular Phylogenetics and Evolution*, 66, 126-137
- c: Shi J.J., Chan, L.M., Peel, A.J., Lai R., Yoder, A.D. & Goodman, S.M. (2014). A deep divergence time between sister species of *Eidolon* (Pteropodidae) with evidence for widespread panmixia. *Acta Chiropterologica*, 16, 279-292.
- d: Sakai, T., Kikkawa, Y., Tsuchiya, K., Harada, M., Kanoe, M., Yoshiyuki, M. & Yonekawa, H. (2003) Molecular phylogeny of Japanese Rhinolophidae based on variations in the complete sequence of the mitochondrial cytochrome b gene. *Genes & Genetic Systems* 78, 179-189.
- e: Giannini, N.P., Almeida, F.C., Simmons, N.B. & DeSalle, R. (2006) Phylogenetic relationships of the enigmatic Harpy fruit bat, *Harpyionycteris* (Mammalia: Chiroptera: Pteropodidae). *American Museum of Natural History*, 3533,1-12.
- f: Almeida, F.C., Giannini, N.P., DeSalle, R. & Simmons, N.B. (2011). Evolutionary relationships of the old world fruit bats (Chiroptera, Pteropodidae): another star phylogeny? *BMC Evolutionary Biology*, 11, 281.
